# Supplementary material for: Optimal duration of dual antiplatelet therapy for minor stroke within 72 hours of symptom onset: a prospective cohort study
Source: HighWire-hosted journal article supplement (doi:10.1136/svn-2023-002933), 2024-09-13
Supplement: svn-2023-002933supp001_data_supplement.pdf [file svn-2023-002933supp001_data_supplement.pdf]

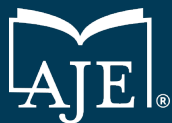

# Editing Certificate

This document certifies that the manuscript

## **Optimal Duration of Dual Antiplatelet Therapy for Minor Stroke Within 72 Hours of Symptom Onset: A Prospective Cohort Study**

prepared by the authors

**Tingting Liu; Yongle Wang; Kaili Zhang; Haimei Fan; Yanan Li; Jing Ren; Juan Li; Yali Li; Xinyi Li; Xuemei Wu; Junhui Wang; Lixi Xue; Xiaolei Gao; Yuping Yan; Gaimei Li; Qingping Liu; Wenhua Niu; Wenxian Du; Yuting Liu; Xiaoyuan Niu.**

was edited for proper English language, grammar, punctuation, spelling, and overall style by one or more of the highly qualified native English speaking editors at AJE.

This certificate was issued on **April 29, 2024** and may be verified on the [AJE website](#) using the verification code **1CA2-C62C-C941-A9E7-D81P**.

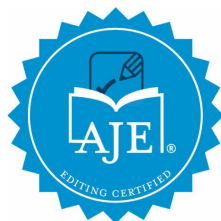

Neither the research content nor the authors' intentions were altered in any way during the editing process. Documents receiving this certification should be English-ready for publication; however, the author has the ability to accept or reject our suggestions and changes. To verify the final AJE edited version, please visit our verification page at [aje.com/certificate](#). If you have any questions or concerns about this edited document, please contact AJE at [support@aje.com](mailto:support@aje.com).

AJE provides a range of editing, translation, and manuscript services for researchers and publishers around the world. For more information about our company, services, and partner discounts, please visit [aje.com](#).
