# Supplementary material for: Optimal duration of dual antiplatelet therapy for minor stroke within 72 hours of symptom onset: a prospective cohort study
Source: HighWire-hosted journal article supplement (doi:10.1136/svn-2023-002933), 2024-09-13
Supplement: svn-2023-002933supp002_data_supplement.pdf [file svn-2023-002933supp002_data_supplement.pdf]

Protocol V3.0 (August 19, 2020)

Safety and efficacy of aspirin-clopidogrel in acute non-cardiogenic minor ischemic stroke: a prospective and multicenter study based on real-world (SEACOAST)

## Introduction and rationale

Although cerebrovascular disease is the second most common cause of death in the world[1], it is the leading cause of death in China[2]. Stroke has become a major public health problem that seriously impacts the national economy and people's livelihood in China because of its high incidence and recurrence rate and high rate of disability, complications, and mortality[3]. Presently, the diagnostic criteria of minor ischemic stroke (MIS) lacks consensus among researchers[4]. A NIHSS score  $\leq 3$  or  $\leq 5$  is considered to indicate MIS. The results of the 2012 CHANCE study showed that early dual antiplatelet therapy with aspirin plus clopidogrel within 24 hours of onset could effectively reduce the relative risk of recurrent stroke by 32% without an increased risk of hemorrhage for patients with MIS (NIHSS  $\leq 3$ ) or high-risk transient ischemic attack (ABCD2  $> 4$ )[5]. The findings of the CHANCE study were confirmed in the POINT trial, and both enrolled patients with NIHSS scores  $\leq 3$  within 24 or 12 hours after onset[5][6]. At present, intravenous thrombolysis therapy or **intra-arterial mechanical thrombectomy** can lead to neurological function improvement, which is defined by a NIHSS score  $\leq 5$ [7]. A NIHSS score of 5 indicates the beginning of disability[8]. However, whether thrombolysis is recommended for patients with a NIHSS score between 3 and 5 remains controversial, especially if deficits are not disabling. Early dual antiplatelet therapy may also be effective for secondary stroke prevention. However, if a stroke patient has a NIHSS score between 3 and 5 and an onset of 24 to 72 hours, the benefit of DAPT is unclear. This subgroup of stroke patients was not studied in the CHANCE or the POINT trial. Our questionnaire survey of neurologists showed that approximately 23% of patients with NIHSS scores  $\leq 5$  were treated with DAPT. Approximately 18% of neurologists would choose DAPT for patients with an onset within 24-72 hours. Approximately

29 52% of neurologists prescribed DAPT for patients with a NIHSS score between 3 to 5.  
30 Our single-center retrospective study of stroke patients with a NIHSS  $\leq 5$  and an  
31 onset time within 72 hours showed that 6.1% had recurrent strokes if treated with  
32 DAPT, compared to 10.8% in those who received aspirin only. Moreover,  
33 neurologists would like to prescribe DAPT for stroke patients with a NIHSS score  $\leq 5$   
34 and within 72 hours of onset. Therefore, there is a gap between the evidence found  
35 from two clinical trials and real-world clinical practice. The latest meta-analysis  
36 showed that stroke patients could benefit from receiving the benefits of DAPT could  
37 be used for stroke patients 3 days after onset[9], a time point at which deterioration of  
38 early neurological function would begin. A registry study in South Korea showed that  
39 more than 70% of patients (with  $4 \leq \text{NIHSS} \leq 7$ ) were treated with DAPT[10]. Last, a  
40 subgroup analysis of the CHANCE trial showed that the proportion of ICAS in China  
41 was as high as 55.8%[11], indicating that large artery stenosis is a cause of ischemic  
42 stroke in Chinese patients. Research on the benefit of DAPT for stroke patients with  
43 higher NIHSS scores and the expanded time window to begin treatment is  
44 ongoing[12]. However, the efficacy and safety of dual antiplatelet therapy for acute  
45 minor stroke (MIS patients with a NIHSS score  $\leq 5$  and onset within 72 hours) remain  
46 unclear.

47 We make the following primary hypotheses: in patients with NIHSS score  $\leq 5$  within  
48 72 hours of symptom onset, dual antiplatelet therapy with aspirin and clopidogrel  
49 also should reduce stroke recurrence risk at 90 days. Our study on the safety and efficacy of  
50 dual antiplatelet therapy in patients with acute noncardiogenic minor ischemic stroke (NIHSS score  $\leq 5$ )  
51 (SEACOAST) is a multicenter study of the application of DAPT in real-world practice.

52

## 53 **Methods**

### 54 **Design**

55 SEACOAST is a multicenter, nonrandomized, and prospective registry trial in China  
56 intended to demonstrate the efficacy and safety of dual antiplatelet therapy for acute  
57 minor stroke (with NIHSS score  $\leq 5$  and onset within 72 hours). The main aim of the

present study is to test the hypothesis that dual antiplatelet therapy should reduce the incidence of 90-day stroke recurrence and improve the functional outcomes of patients with acute minor stroke (MIS patients with a NIHSS score  $\leq 5$  and onset within 72 hours) but should not increase the risk of symptomatic intracranial hemorrhage.

All patients who meet the enrollment criteria will be invited to participate. The study was approved by the Ethics Committee of the First Hospital of Shanxi Medical University. Written informed consent will be signed prior to enrollment. Participants will be divided into two groups: the dual antiplatelet therapy (DAPT) group and the single antiplatelet therapy (SAPT) group. Patients with acute minor stroke (NIHSS score  $\leq 5$ ) and onset within 72 hours, as judged by the investigators, who received antiplatelet therapy at approximately 5-10 stroke centers in China between October 2019 and November 2021 were enrolled in the trial. The detailed inclusion/exclusion criteria as follow. Study recruitment started in September 2019, and the estimated primary completion date was November 2021.

#### **Ethics and dissemination**

The patient or their guardian signed an informed consent form. The Ethics Committee of First Hospital of Shanxi Medical University approved the procedure, and approval was obtained from all other participating centers. The ethics approval number is 2019-SK004. The study protocol is registered at <https://www.chictr.org.cn> (ID: ChiCTR1900025214).

#### **Study organization**

The initial protocol was designed by the SEACOAST group and discussed by the academic team. The Steering Committee was composed of the Shanxi Stroke Association. Neuroimaging associated with clinical events was performed centrally

and interpreted by three independents blinded neuroradiologists. The trial is partially supported by the Shanxi Stroke Association.

## **Patient population (Inclusion/Exclusion Criteria)**

### **Inclusion Criteria:**

- 1) acute minor ischemic stroke (NIHSS score  $\leq 5$  within 72 hours of symptom onset);
  - 2) had been treated with antiplatelet drugs.
  - 3) Informed consent signed.
- (Symptom onset is defined by the “last seen normal” principle.)

### **Exclusion Criteria**

- 1) Prestroke Modified Rankin Scale (mRs) Score  $> 2$  (premorbid historical assessment);
- 2) Diagnosis of hemorrhage or other pathology, such as vascular malformation, tumor, abscess or other major nonischemic brain disease (e.g., multiple sclerosis) on baseline head CT or MRI.
- 3) TIA;
- 4) Clear indication for anticoagulation (presumed cardiac source of embolus, e.g., atrial fibrillation, prosthetic cardiac valves known or suspected endocarditis).
- 5) Patients who receive early intravenous thrombolysis or arterial thrombolysis;
- 6) Currently or within 30 days before enrollment receiving an investigational drug or device.
- 7) No use or use of other antiplatelet drugs (except aspirin, clopidogrel);
- 8) Pregnant or lactating patients and patients planning to become pregnant within 90 days.

109 9) Those with severe mental disorders, unable to provide informed consent or unable  
110 to cooperate with the follow-up due to dementia.

111 10) Patients with complicated severe systemic disease with a life expectancy < 3  
112 months.

113 11) Planned or likely revascularization (any angioplasty or vascular surgery) within 3  
114 months.

115

### 116 **Sample size determination**

117 Prior to commencing this prospective study, we identified significant gaps in  
118 specific data regarding stroke recurrence rates within the target population.  
119 Consequently, we opted to collect hospitalization data from three stroke centers in the  
120 province as an initial step. Regrettably, due to insufficient follow-up information, our  
121 analysis was limited solely to stroke deterioration occurring during hospitalization.  
122 Subsequently, this data was utilized for the purpose of sample size calculation.

123 Our single-center study results indicated that the probability of **stroke recurrence**  
124 was approximately 10.8% in the aspirin group and 6.1% in the DAPT group.  
125 Considering the 10.8% recurrent stroke rate in the aspirin group and the 6.1%  
126 recurrent stroke rate in DAPT group, a p value < 0.05 indicating statistical  
127 significance at the 95% confidence interval, and a 10% drop out rate, the target  
128 number of participants will be at least 2500; PASS 22.0 will be used to perform  
129 sample size calculation.

130

### 131 **Data collection**

132 Data were collected prospectively using the Research Electronic Data Capture  
133 (REDCap), which is a secure web-based software platform that supports data capture  
134 for research studies by providing (1) an intuitive interface for validated data capture,  
135 (2) audit trails for tracking data manipulation and export procedures, (3) automated  
136 export procedures for seamless data downloads to common statistical packages, and

(4) procedures for data integration and interoperability with external sources. All researchers are trained in a unified manner. Data are currently registered in the web-based registry available at <https://www.palacetrail.cn>.

The following data were directly obtained from the registry database: (1) demographics, including age, sex, body mass index, smoking, admission systolic blood pressure (SBP), and diastolic blood pressure (DBP); (2) medical history, including previous TIA, previous stroke, previous coronary artery disease (CAD), previous peripheral artery disease (PAD), hypertension (HTN), diabetes mellitus (DM), dyslipidemia, smoking, and atrial fibrillation (AF); (3) previous medication, including previous antiplatelet, anticoagulated, antihypertensive and statins medication use; (4) stroke characteristics, including the time from onset to arrival (categorized as  $\leq 24$  hours and among 24 hours to 72 hours), initial NIHSS scores (categorized as  $\leq 3$  score and between 4 to 5 score), prestroke mRS score, and ischemic stroke subtype according to the TOAST criteria; (5) laboratory data, including white blood cell counts, creatinine serum levels, platelet counts, international normalized ratio (INR), urea, homocysteine (Hcy), and fasting low-density lipoprotein cholesterol (LDL-C); (6) in-hospital treatment, including antiplatelet, lipid lowering, antidiabetic and antihypertensive therapy, and (7) in-hospital imaging evaluation, including cranial MRI/CT examination and vascular examination (TCD/MRA/CTA/DSA) helped to determine the presence of intracranial cerebral atherosclerosis (ICAS), determined by 50%–99% stenosis of large intracranial arteries according to Warfarin-Aspirin Symptomatic Intracranial Disease (WASID) trial criteria[13]; and (8) monitoring of some indicators, including daily blood pressure and blood glucose monitoring record results. For continuous variables, the missing value data were used by multiple imputation, and the optimal imputation data summarized after 5 interpolations were selected by the system for analysis.

#### **Pharmaceutical regimen**

165 The study subjects were divided into two groups for comparison according to the  
166 initial antiplatelet regimen: single antiplatelet therapy (SAPT) with monotherapy of  
167 aspirin (dose of 81mg/100mg/200mg/300mg) or clopidogrel (dose of 75mg/150mg/  
168 300mg) and dual antiplatelet therapy (DAPT) with aspirin (dose of 81mg/100mg/  
169 200mg/300mg) plus clopidogrel (load dose of 75mg/150mg/300mg).

170

#### 171 **Data management**

172 Data quality control was divided into three parts: first, the patients' hospital  
173 information was retrieved from the electronic medical records system of each  
174 subcenter; second, the trained researchers randomly performed cross data quality  
175 control every month; and third, three senior neurologists performed data quality  
176 control every month. We will use the data management system to manage the data.  
177 All data will be downloaded and analyzed at the First Affiliated Hospital of Shanxi  
178 Medical University.

#### 179 **Follow-up time**

180 The follow-up time for the two groups will be 90 days and one year. Vascular events  
181 were prospectively observed during hospitalization and during a 3-month follow-up  
182 period after the qualifying event via routine clinic visits or telephone interviews  
183 performed by experienced physicians with a predefined protocol. To ensure the  
184 accuracy of the outcome captured and to minimize inter-interviewer discrepancy, a set  
185 of uniform structured questionnaires was used by trained personnel. Enrollment will  
186 stop on November 31, 2021.

187

#### 188 **Outcomes**

189 We set a composite vascular event (ischemic stroke, TIA, symptomatic intracerebral  
190 hemorrhage, myocardial infarction or angina attacks, and vascular death) as the  
191 primary outcome at 90 days. Recurrent ischemic stroke: (1) sudden onset of a new  
192 focal neurologic deficit, with clinical or imaging evidence of infarction lasting  $\geq 24$   
193 hours and not attributable to a nonischemic cause (i.e., not associated with brain  
194 infection, trauma, tumor, seizure, severe metabolic disease, or degenerative  
195 neurologic disease), and (2) a new focal neurologic deficit lasting  $< 24$  hours and not  
196 attributable to a nonischemic cause but accompanied by neuroimaging evidence of  
197 new brain infarction. Imaging indicated that the new infarct should be geographically  
198 distinct from the original infarct[5]. Progressive ischemic stroke: rapid worsening of  
199 an existing focal neurologic deficit (NIHSS increasing  $\geq 4$ , excluding hemorrhagic  
200 transformation after infarction or symptomatic intracranial hemorrhage) lasting  $> 24$   
201 hours and not attributable to a nonischemic cause, accompanied by new ischemic  
202 changes from the initial infarct on baseline magnetic resonance imaging or computed  
203 tomography of the brain[14]. Symptomatic intracerebral hemorrhage was defined as  
204 acute infiltration of blood into the brain parenchyma or subarachnoid space with  
205 associated neurological symptoms and imaging findings with an increase in the  
206 NIHSS score of four or more points[5]. Any subject who had rapid resolution of  
207 symptoms and no brain imaging suggesting tissue infarction was considered to have  
208 had a TIA. Any patient initially diagnosed with stroke who did not have further brain  
209 imaging with evidence of infarction but had complete resolution of symptoms within  
210 24 hours were considered to have had a TIA[6]. Myocardial infarction was confirmed  
211 if one had more than two from below: typical chest pain, Troponin elevation, ECG  
212 changes (new ST segment changes, new Q wave, or new left bundle branch  
213 block)[15]. vascular death if definition as death due to vascular events[16]. Further  
214 efficacy exploratory analysis of mRS score changes (continuous) was performed and  
215 dichotomized at percentages of 0 to 2 versus 3 to 6 at the 3-month and one-year  
216 follow-ups.



217 Safety endpoints included severe bleeding incidence (Global Use of Strategies to  
218 Open Occluded Coronary Arteries definition), including severe bleeding and  
219 symptomatic intracranial hemorrhage; moderate bleeding (Global Use of Strategies to  
220 Open Occluded Coronary Arteries definition). Moderate hemorrhage was defined as  
221 bleeding that required transfusion of blood but did not lead to hemodynamic  
222 compromise requiring intervention[17]. Severe hemorrhage was defined as fatal or  
223 intracranial hemorrhage or other hemorrhage causing hemodynamic compromise that  
224 required blood or fluid replacement, inotropic support, or surgical intervention[18],  
225 and all bleeding events (intracerebral hemorrhage, skin bleeding, mucous membrane  
226 bleeding, gastrointestinal bleeding, and another visceral organ bleeding) during  
227 follow-up. All adverse events will be recorded.

228

### 229 **Statistical analysis**

230 Continuous variables that are normally distributed will be presented as the mean value  
231 and SD. When variables were not normally distributed, they were presented as  
232 medians and IQRs. Count data will be described with n (%). Student's t test was used  
233 for continuous variables, and the Pearson  $\chi^2$  test was used for categorical variables.  
234 To compare the survival curve and survival rate of stroke recurrence, survival analysis  
235 will be conducted. Cox proportional hazard models will be used to explore the risk  
236 factors for recurrent ischemic stroke. Propensity score matching will be used to  
237 control for confounding factors. All analyses were performed in SPSS 26.0 and the  
238 statistical software package R (<http://www.R-project.org>, The R Foundation).

239

### 240 **Discussion**

241 An important treatment strategy for patients with acute ischemic stroke is to prevent  
242 deterioration and recurrence of stroke. The treatment standard for patients with acute  
243 minor ischemic stroke has not been well established[19]. The CHANCE and POINT  
244 trials[5][6] have shown that DAPT is superior to aspirin alone in patients with minor  
245 ischemic stroke (NIHSS score  $\leq 3$ ) or high-risk TIA. A South Korean registration

study showed that more than 70% of patients with a NIHSS score 4-7 treated with DAPT within 24 hours of onset were also affected[10]. Therefore, the optimal time frame to start DAPT post stroke to achieve efficacy remains unclear[4][20]. Patients with AIS can present within 24 hours, 48 hours, 72 hours, and even 7 days post onset[21][22]. DAPT may be the only method for preventing early deterioration in late presenters<sup>22</sup>. A meta-analysis of dual versus mono antiplatelet therapy for acute non-cardioembolic IS or TIA patients within 3 days of symptom onset showed that compared with aspirin alone, DAPT was associated with a significant reduction in stroke recurrence (RR, 0.70; 95% CI, 0.59–0.82; P<0.001)[9]. The latest meta-analysis showed that DAPT can benefit patients if given within 3 days of onset. In this proposed trial, loss to follow-up may occur. To prevent such a potential problem, the researchers will implement several methods for securing the follow-up. In addition, because of its multicenter design, confounding bias and selection bias will be well controlled. This trial to explore the efficacy and safety of dual antiplatelet therapy in patients with acute minor stroke (NIHSS score  $\leq 5$  and onset within 72 hours). Regardless of positive or negative results, the trial will provide valuable evidence on the appropriate treatment for this stroke population.

## References

- 1 Adams HP, Bendixen BH, Kappelle LJ, *et al.* Classification of subtype of acute ischemic stroke. Definitions for use in a multicenter clinical trial. TOAST. Trial of Org 10172 in Acute Stroke Treatment. *Stroke*. 1993;24:35–41.
- 2 Wang W, Jiang B, Sun H, *et al.* Prevalence, Incidence, and Mortality of Stroke in China: Results from a Nationwide Population-Based Survey of 480 687 Adults. *Circulation*. 2017;135:759–71.
- 3 Wu S, Wu B, Liu M, *et al.* Stroke in China: advances and challenges in epidemiology, prevention, and management. *The Lancet Neurology*. 2019;18:394–405.
- 4 Fischer U, Baumgartner A, Arnold M, *et al.* What Is a Minor Stroke? *Stroke*.

- 274 2010;41:661–6.
- 275 5 Wang Y, Wang Y, Zhao X, *et al.* Clopidogrel with Aspirin in Acute Minor Stroke  
276 or Transient Ischemic Attack. *N Engl J Med.* 2013;369:11–9.
- 277 6 Johnston SC, Easton JD, Farrant M, *et al.* Clopidogrel and Aspirin in Acute  
278 Ischemic Stroke and High-Risk TIA. *N Engl J Med.* 2018;379:215–25.
- 279 7 Powers WJ, Rabinstein AA, Ackerson T, *et al.* Guidelines for the Early  
280 Management of Patients With Acute Ischemic Stroke: 2019 Update to the 2018  
281 Guidelines for the Early Management of Acute Ischemic Stroke: A Guideline for  
282 Healthcare Professionals From the American Heart Association/American Stroke  
283 Association. *Stroke.* 2019;50. doi: 10.1161/STR.0000000000000211
- 284 8 Khatri P, Tayama D, Cohen G, *et al.* Effect of Intravenous Recombinant  
285 Tissue-Type Plasminogen Activator in Patients With Mild Stroke in the Third  
286 International Stroke Trial-3: Post Hoc Analysis. *Stroke.* 2015;46:2325–7.
- 287 9 Wong KSL, Wang Y, Leng X, *et al.* Early Dual Versus Mono Antiplatelet  
288 Therapy for Acute Non-Cardioembolic Ischemic Stroke or Transient Ischemic  
289 Attack: An Updated Systematic Review and Meta-Analysis. *Circulation.*  
290 2013;128:1656–66.
- 291 10 Kim J-T, Park M-S, Choi K-H, *et al.* Comparative Effectiveness of Dual  
292 Antiplatelet Therapy With Aspirin and Clopidogrel Versus Aspirin Monotherapy  
293 in Acute, Nonminor Stroke: A Nationwide, Multicenter Registry-Based Study.  
294 *Stroke.* 2019;50:3147–55.
- 295 11 Liu L, Wong KSL, Leng X, *et al.* Dual antiplatelet therapy in stroke and ICAS:  
296 Subgroup analysis of CHANCE. *Neurology.* 2015;85:1154–62.
- 297 12 Hou X, Li X, Wang X, *et al.* Antiplatelet Therapy in Acute Mild-Moderate  
298 Ischemic Stroke (ATAMIS): a parallel, randomised, open-label, multicentre,  
299 prospective study. *Stroke Vasc Neurol.* 2018;3:263–7.
- 300 13 Kasner SE, Lynn MJ, Chimowitz MI, *et al.* Warfarin vs aspirin for symptomatic

- 301 intracranial stenosis: Subgroup analyses from WASID. *Neurology*.  
302 2006;67:1275–8.
- 303 14 Coutts SB, Hill MD, Campos CR, *et al*. Recurrent Events in Transient Ischemic  
304 Attack and Minor Stroke: What Events Are Happening and to Which Patients?  
305 *Stroke*. 2008;39:2461–6.
- 306 15 Kim BJ, Park J-M, Kang K, *et al*. Case Characteristics, Hyperacute Treatment,  
307 and Outcome Information from the Clinical Research Center for Stroke-Fifth  
308 Division Registry in South Korea. *J Stroke*. 2015;17:38.
- 309 16 Chen Y, Wright N, Guo Y, *et al*. Mortality and recurrent vascular events after first  
310 incident stroke: a 9-year community-based study of 0.5 million Chinese adults.  
311 *The Lancet Global Health*. 2020;8:e580–90.
- 312 17 Wang P, Wang Y, Zhao X, *et al*. In-hospital medical complications associated  
313 with stroke recurrence after initial ischemic stroke: A prospective cohort study  
314 from the China National Stroke Registry. *Medicine*. 2016;95:e4929.
- 315 18 An International Randomized Trial Comparing Four Thrombolytic Strategies for  
316 Acute Myocardial Infarction. *N Engl J Med*. 1993;329:673–82.
- 317 19 Hachinski V. World Stroke Day 2008: “Little Strokes, Big Trouble”. *Stroke*.  
318 2008;39:2407–8.
- 319 20 Ge F, Lin H, Liu Y, *et al*. Dual antiplatelet therapy after stroke or transient  
320 ischaemic attack - how long to treat? The duration of aspirin plus clopidogrel in  
321 stroke or transient ischaemic attack: a systematic review and meta-analysis. *Eur J*  
322 *Neurol*. 2016;23:1051–7.
- 323 21 Chi N, Wen C, Liu C, *et al*. Comparison Between Aspirin and Clopidogrel in  
324 Secondary Stroke Prevention Based on Real - World Data. *JAHA*.  
325 2018;7:e009856.
- 326 22 Wong KSL, Chen C, Fu J, *et al*. Clopidogrel plus aspirin versus aspirin alone for  
327 reducing embolisation in patients with acute symptomatic cerebral or carotid

328 artery stenosis (CLAIR study): a randomised, open-label, blinded-endpoint trial.  
329 *The Lancet Neurology*. 2010;9:489–97.

330
