# Supplementary material for: Optimal duration of dual antiplatelet therapy for minor stroke within 72 hours of symptom onset: a prospective cohort study
Source: HighWire-hosted journal article supplement (doi:10.1136/svn-2023-002933), 2024-09-13

## Supplement Figures

**Title:** Optimal Duration of Dual Antiplatelet Therapy for Minor Stroke Within 72 Hours of Symptom Onset: A Prospective Cohort Study

### List of Supplemental Figures

sFigure 1 Curvilinear Relationship between Antiplatelet Duration and Primary Outcome.

A. Curvilinear Relationship between DAPT Duration and Primary Outcome; B. Curvilinear Relationship between SAPT Duration and Primary Outcome.

sFigure 2 Hazard Ratio for the Primary Outcome in Subgroups for Entire Population.

sFigure 3 Hazard Ratio for the Primary Outcome in Subgroups for Population with Shorter Duration (< 10 days) of DAPT Compared with SAPT Group.

sFigure 4 Hazard Ratio for the Primary Outcome in Subgroups for for Population with Long Duration (> 21 days) of DAPT Compared with SAPT Group.

sFigure 5 Cumulative Probability of Primary Events in Four Secondary Therapies.

sFigure 1 Curvilinear Relationship between Antiplatelet Duration and Primary Outcome.

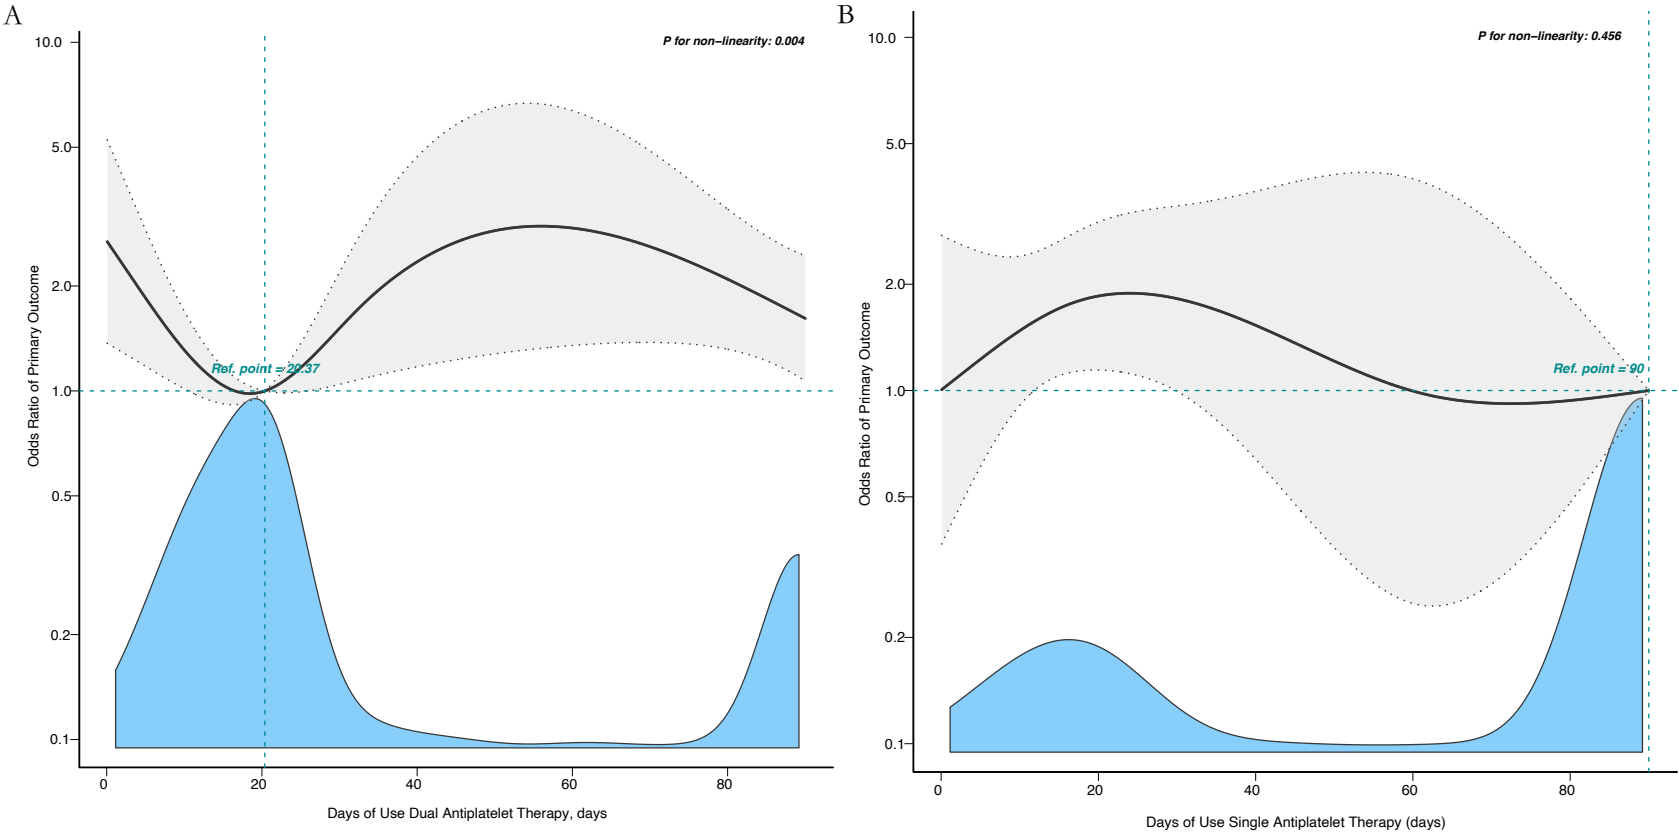

sFigure 2 Hazard Ratio for the Primary Outcome in Subgroups for Entire Population.

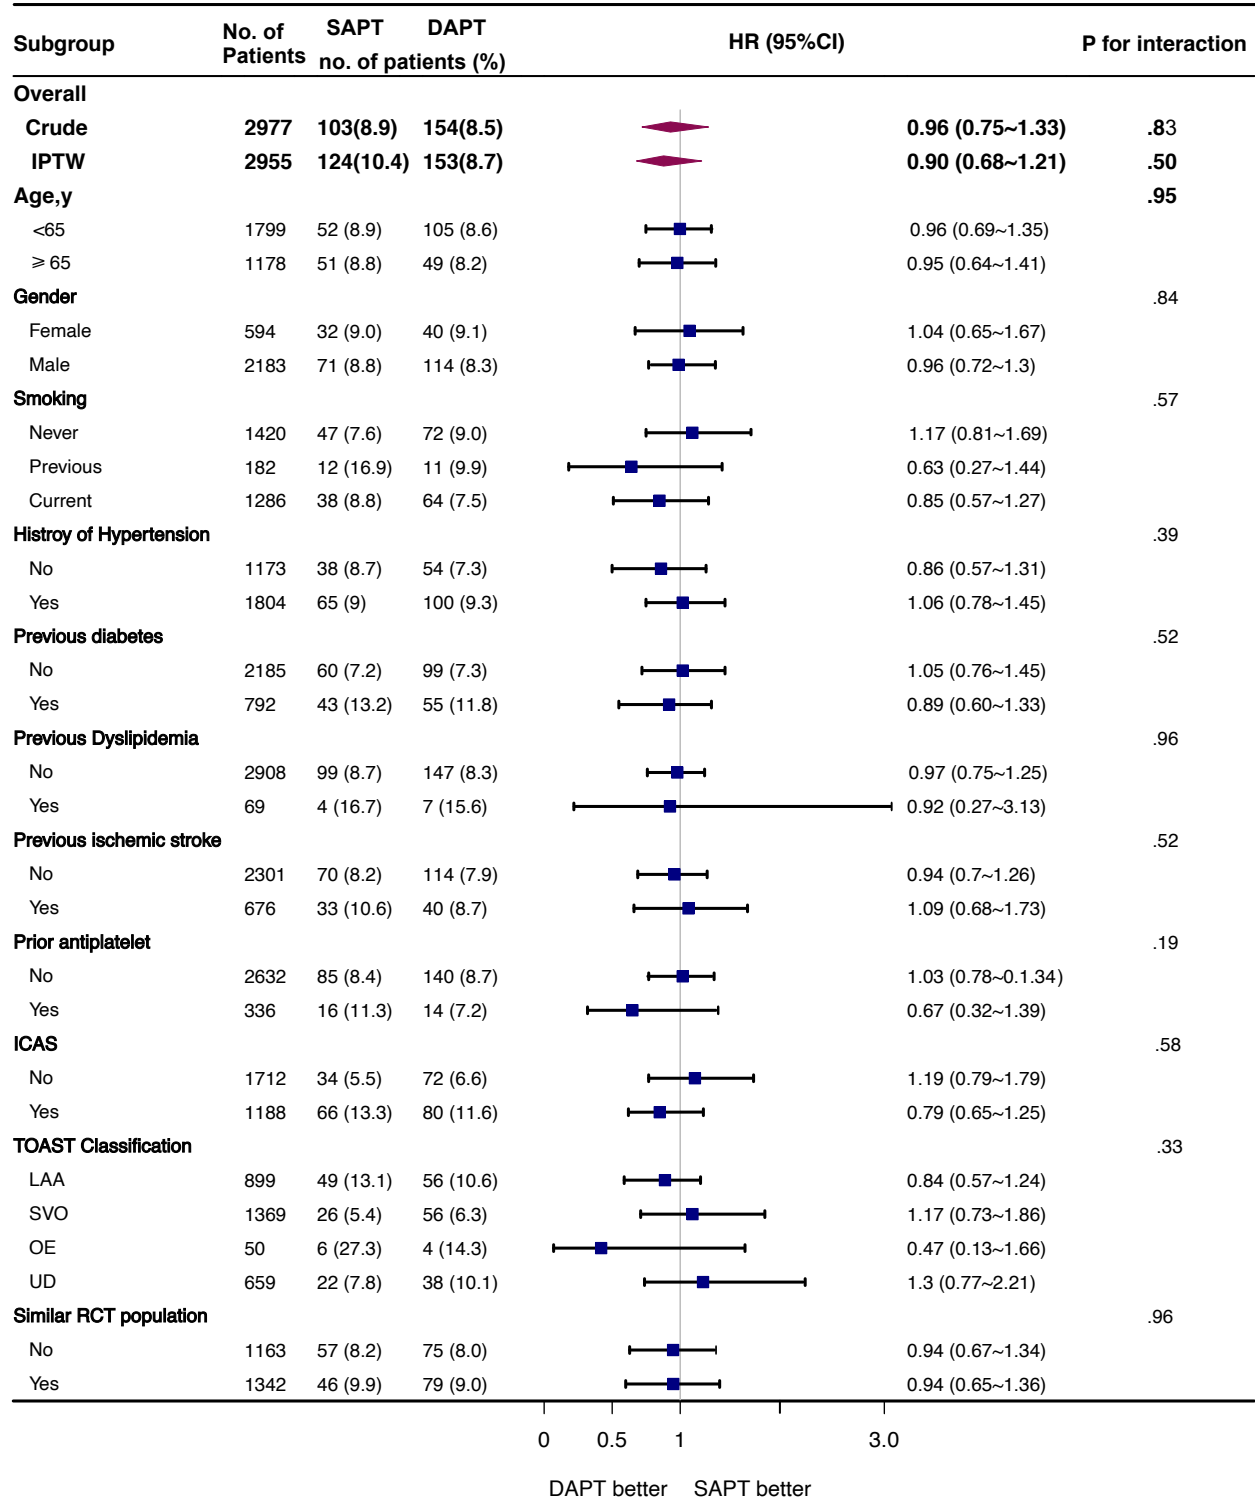

sFigure 3 Hazard Ratio for the Primary Outcome in Subgroups for Population with Shorter Duration (< 10 days) of DAPT Compared with SAPT Group.

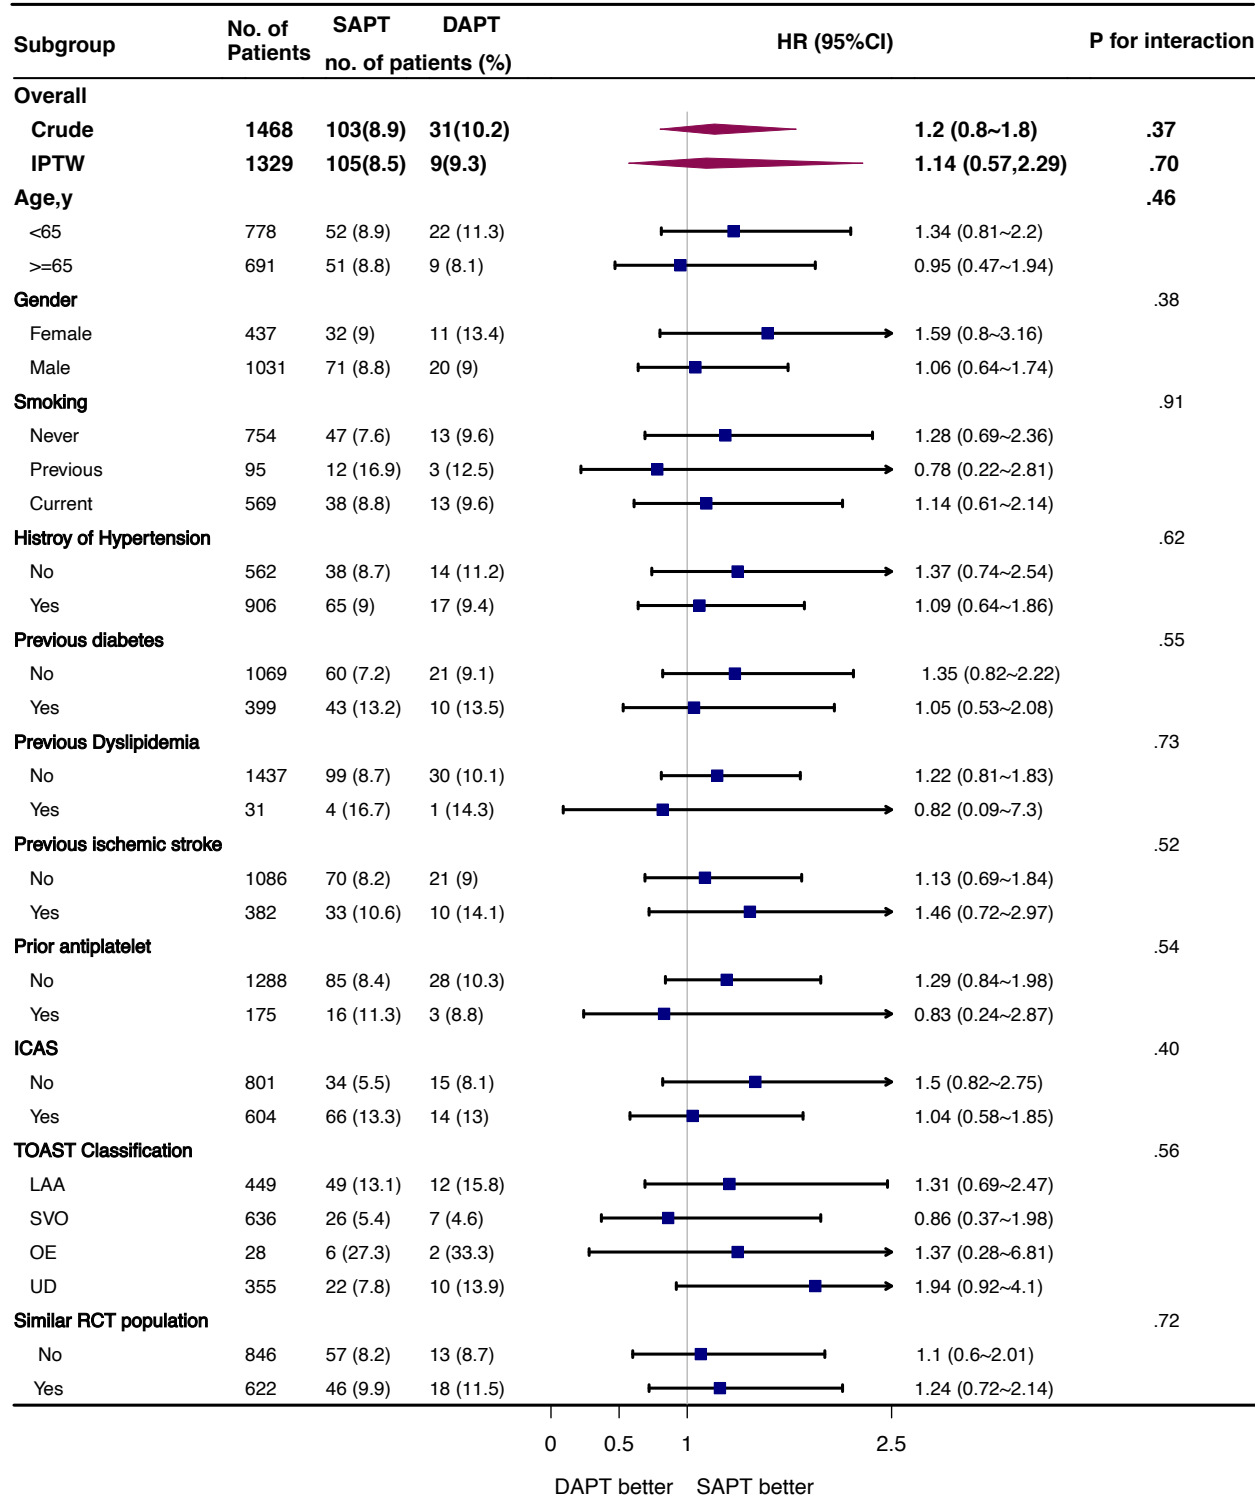

sFigure 4 Hazard Ratio for the Primary Outcome in Subgroups for for Population with Long Duration (> 21 days) of DAPT Compared with SAPT Group.

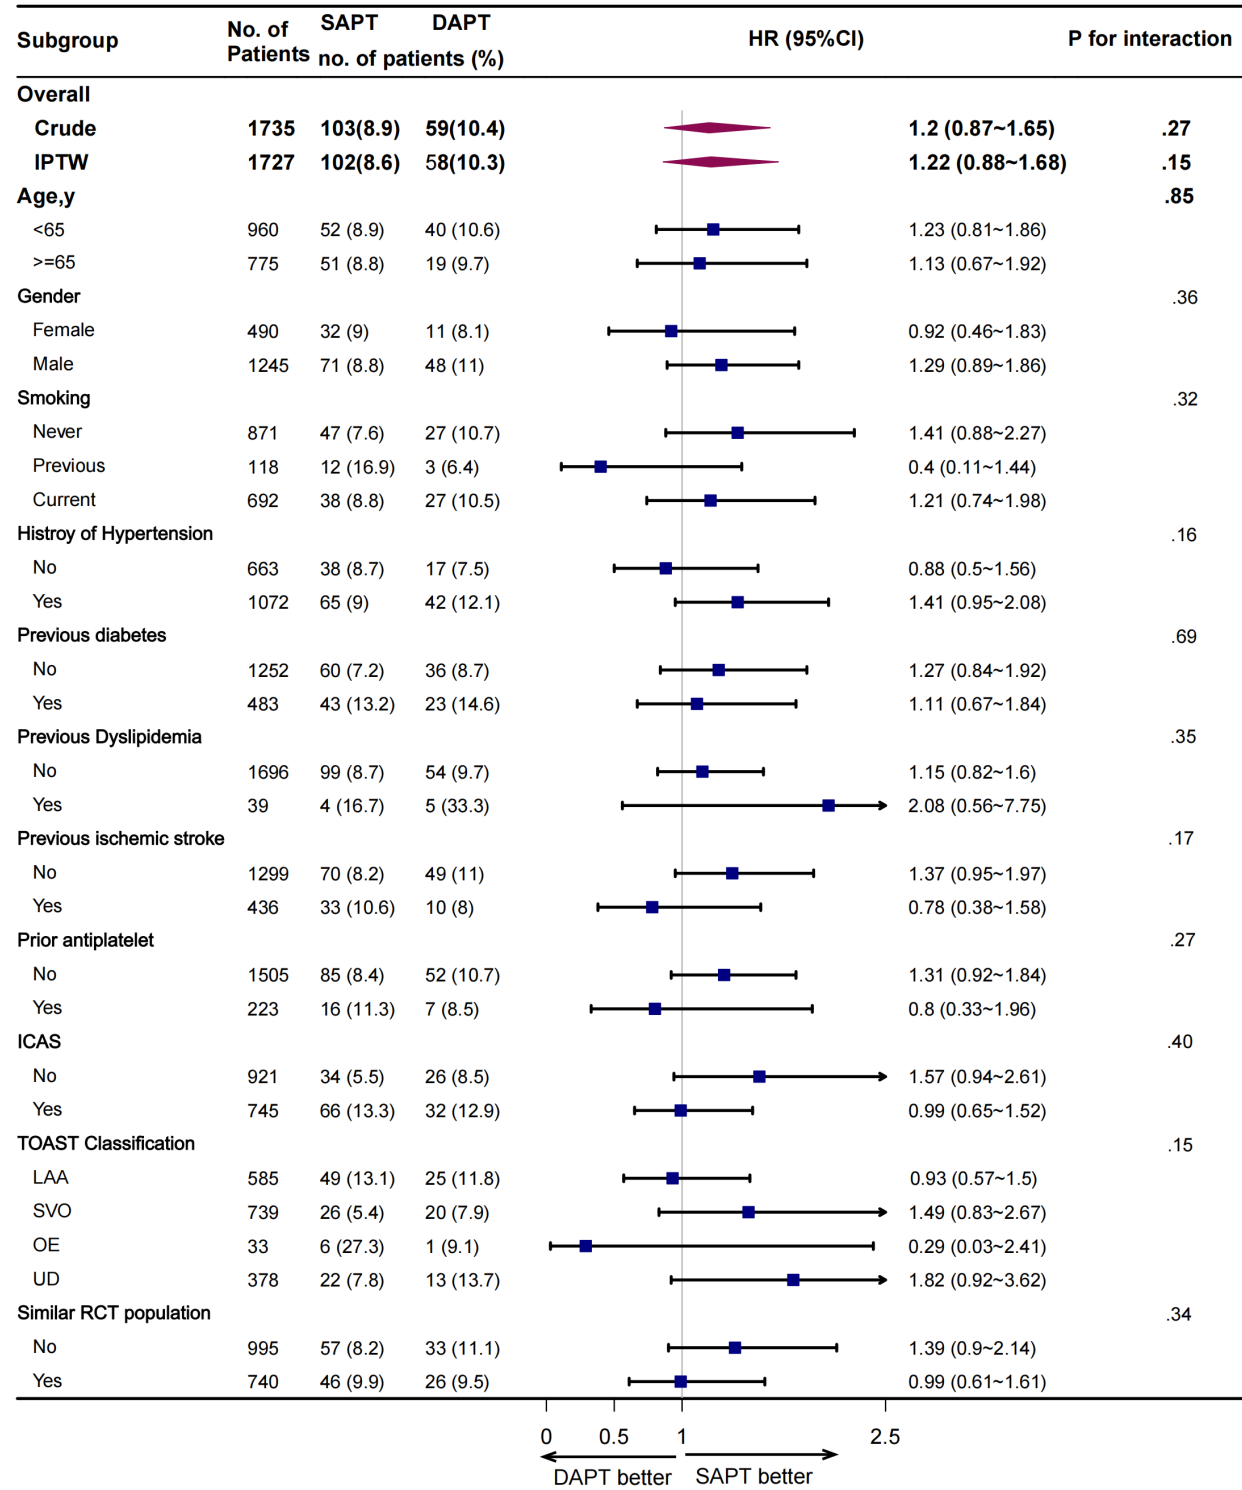

sFigure 5 Cumulative Probability of Primary Events in Four Secondary Therapies.

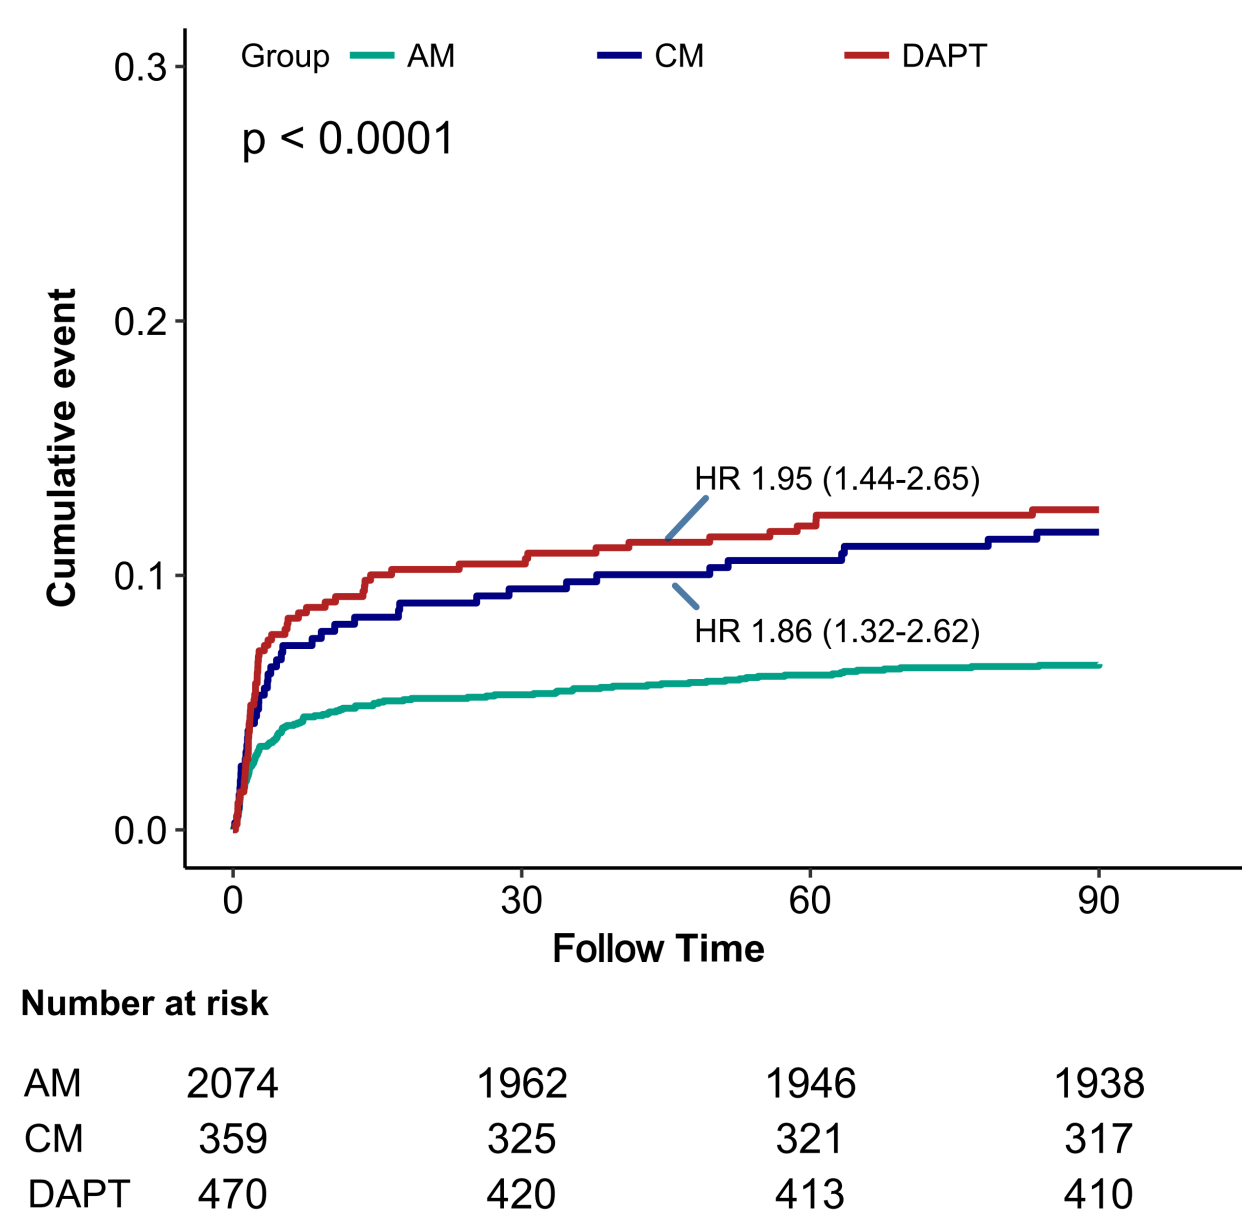

Supplement: svn-2023-002933supp004_data_supplement.pdf [file svn-2023-002933supp004_data_supplement.pdf]
